# Supplementary material for: Synthesis of HyBeacons and dual-labelled probes containing 2′-fluorescent groups for use in genetic analysis
Source: Royal Society of Chemistry journal article supplement (doi:10.1039/b302855k), 2003-01-01
Supplement: b302855k.doc [file b302855k.doc]

# Supplementary data

Oligonucleotide synthesis

Oligonucleotides were assembled on an ABI 394 DNA synthesiser. The oligonucleotide synthesis protocol for the FRET probes (scheme 2, R=b) was the same as that used for the HyBeacon 2DC64C* (scheme 2, R=a), except that an aminohexyl group was added at the 5’-end using trifluoracetylaminolink phosphoramidite which was purchased from Transgenomics Ltd. It was therefore unnecessary to carry out a detritylation step at the end of oligonucleotide synthesis. The TFA group was removed from the 5’-aminohexyl moiety during the standard ammonia Deprotection (5h, 55oC), after which the ammonia was evaporated and the oligonucleotide filtered through Sephadex G25.

# ROX labelling

ROX NHS ester was coupled to the primary amino group at the 5’-end of the oligonucleotide using the following method:

0.63mgs of NHS ROX (Molecular Probes Inc) in 15l DMSO was added to the oligonucleotide (0.2 mole synthesis) dissolved in 50l of 0.5M sodium bicarbonate buffer at pH 8.5 and left at 30oC overnight.

# Oligonucleotide purification

The oligonucleotides were purified by reversed-phase HPLC (octyl) with a gradient of 0% to 40% acetonitrile in 0.1M triethylammonium acetate over 20 minutes, and characterised by MALDI-000TOF mass spectrometry.
