# Supplementary material for: Synthesis of HyBeacons and dual-labelled probes containing 2′-fluorescent groups for use in genetic analysis
Source: Royal Society of Chemistry journal article supplement (doi:10.1039/b302855k), 2003-01-01
Supplement: b302855k.pdf [file b302855k.pdf]

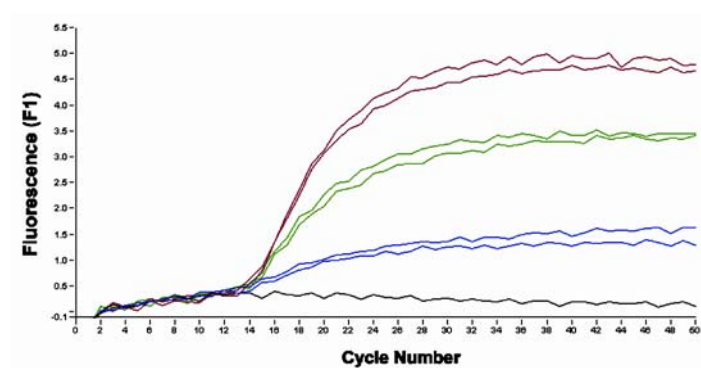

Real-time PCR using 2DC64C\* HyBeacon on Roche LightCycler. Red: Fully complementary homozygous template; Green: Heterozygote; Blue: mutant; Black: Negative control (No template DNA). Experiments carried out in duplicate. Acquisition temp. 57°C.
